# Supplementary material for: HBX-induced miR-5188 impairs FOXO1 to stimulate β-catenin nuclear translocation and promotes tumor stemness in hepatocellular carcinoma
Source: PubMed Central journal article supplement (PMC6831466; doi:10.7150/thno.37717), 2019-10-12
Supplement: thnov09p7583s1.pdf [file thnov09p7583s1.pdf]

1 **Supplementary figures**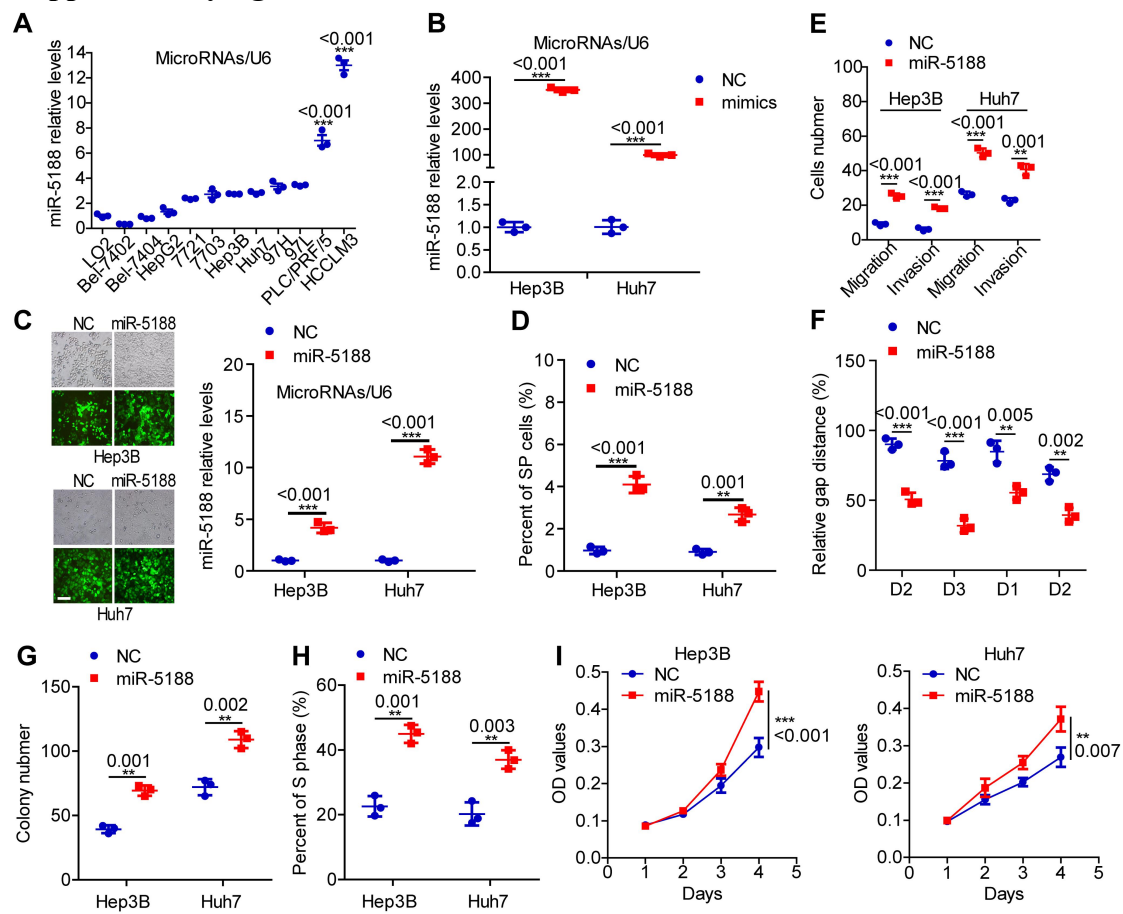

2

3 **Figure S1. MiR-5188 promotes stemness, metastasis, proliferation, and**  
 4 **chemoresistance in HCC.** (A) QPCR analysis confirmed miR-5188 expression in  
 5 Bel-7402, Bel-7404, HepG2, SMMC-7721, QGY-7703, Hep3B, Huh7, MHCC97H,  
 6 PLC/PRF/5, MHCC97L, HCCLM3 and LO2 cells. (B) MiR-5188 expression in HCC  
 7 cells treated with miR-5188 mimics and control cells. (C) MiR-5188 expression was  
 8 examined in HCC cells after stable miR-5188 overexpression and control cells (scale  
 9 bar: 20  $\mu$ m). (D-H) Statistical analysis of the percentage of cells in side populations  
 10 (D) and Transwell (E), wound healing (F), colony formation (G) and EdU  
 11 incorporation assays (H) were performed in miR-5188-overexpressing Hep3B and  
 12 Huh7 cells and the corresponding control cells. (I) MTT assays of  
 13 miR-5188-overexpressing Hep3B and Huh7 cells and the corresponding control cells  
 14 (n=3 independent experiments, general linear model). Comparison of all groups vs.  
 15 the control group by Student's t-test, n=3 independent experiments. All data are  
 16 presented as the mean  $\pm$  SD. Experiments were repeated three times.

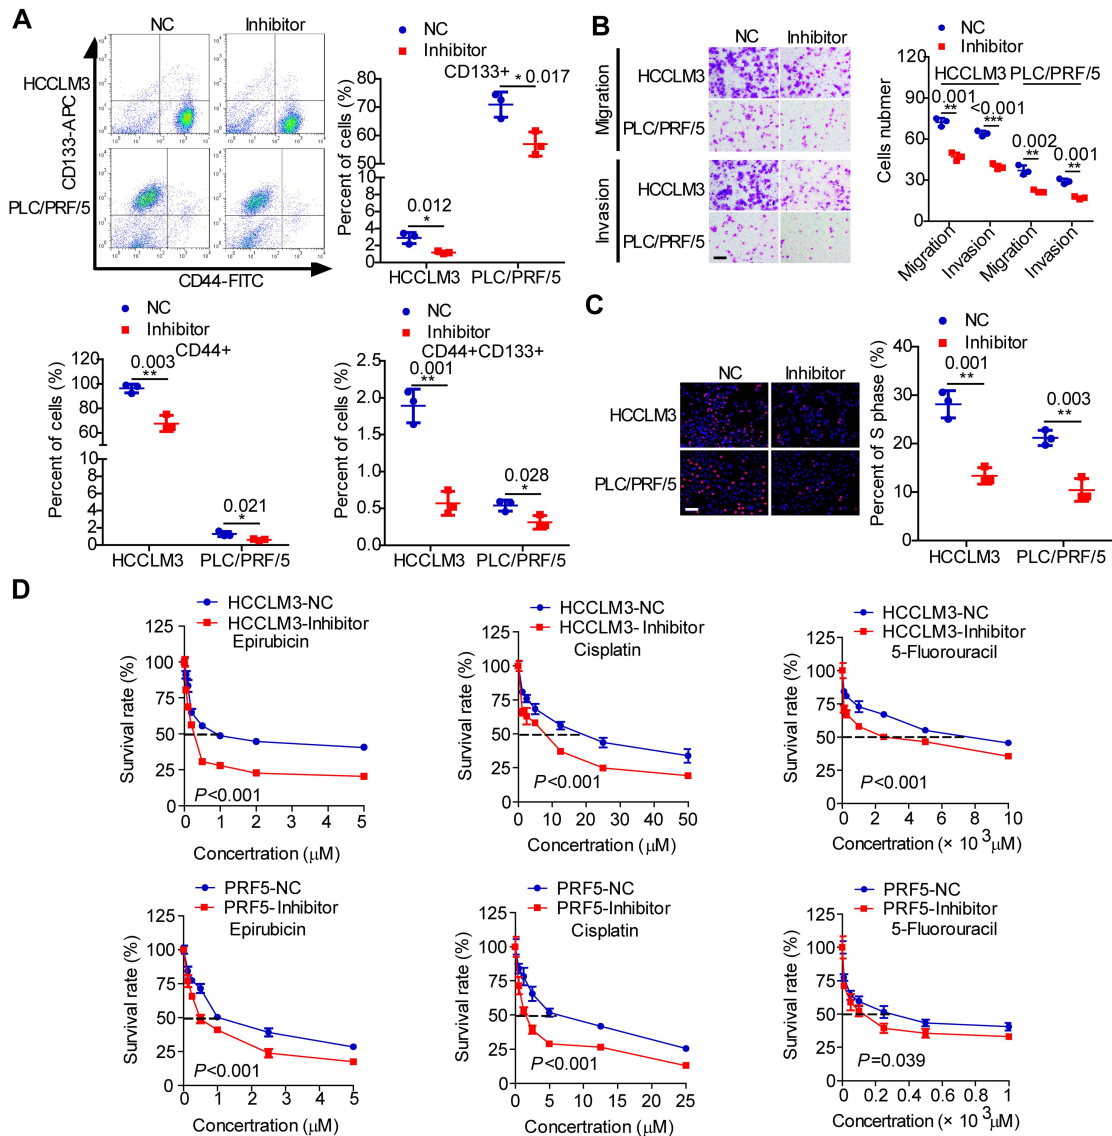

17

18 **Figure S2. MiR-5188 knockdown inhibits stemness, metastasis, proliferation, and**  
 19 **chemoresistance in HCC cells.** Flow cytometry (A), Transwell assays (scale bar: 10  
 20  $\mu\text{m}$ ) (B), EdU incorporation assays (scale bar: 10  $\mu\text{m}$ ) (C) and anticancer drug  
 21 sensitivity tests (D) were performed in miR-5188-silenced Hep3B and Huh7 cells and  
 22 the corresponding control cells. Comparison of all groups vs. the control group by  
 23 Student's t-test,  $n=3$  independent experiments. All data are presented as the mean  $\pm$   
 24 SD. Experiments were repeated three times.

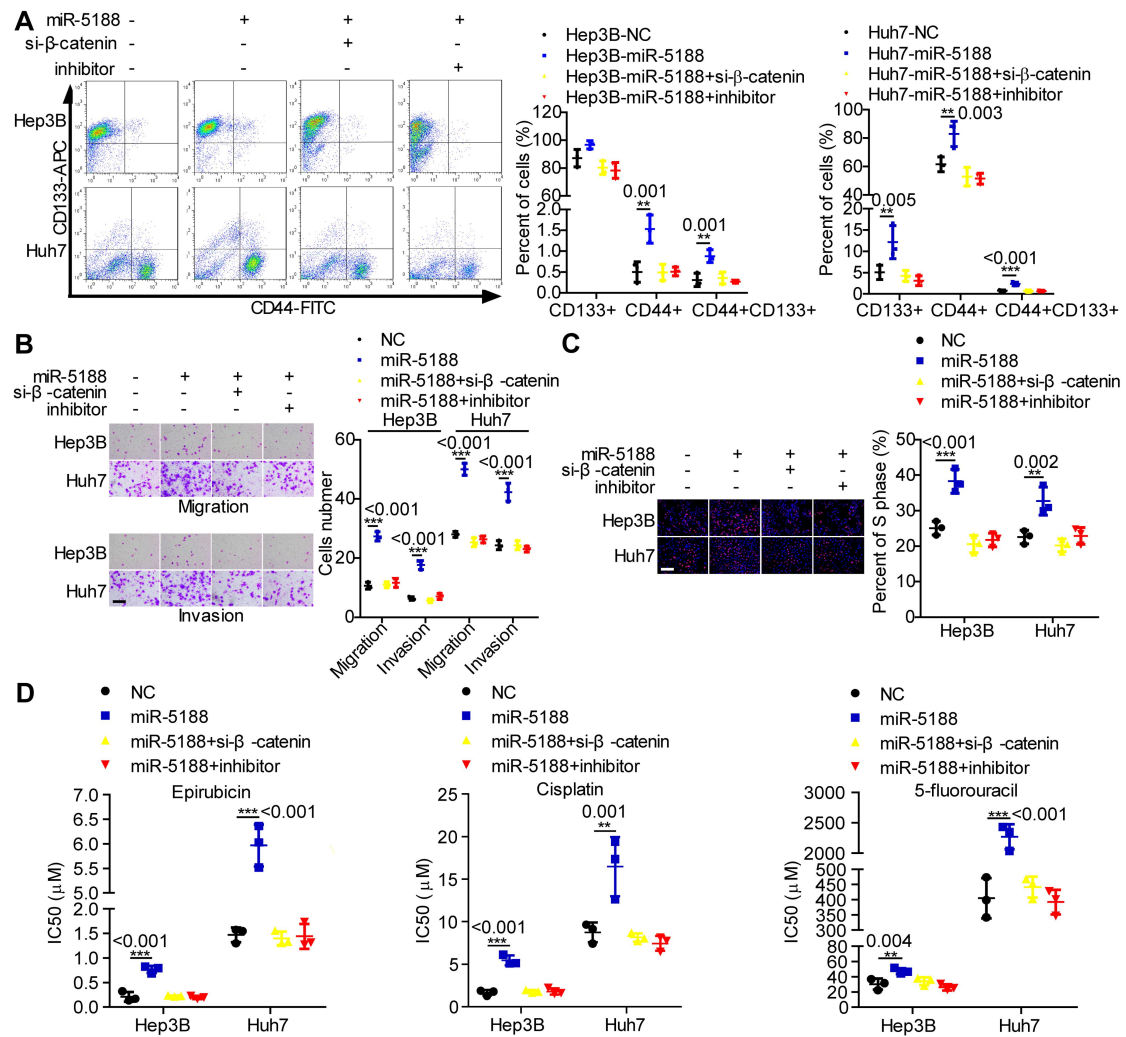

25

26

27

28

29

30

31

32

33

34

**Figure S3. MiR-5188 accelerates  $\beta$ -catenin-mediated tumor stemness, metastasis, proliferation, chemoresistance and Wnt/ $\beta$ -catenin signaling in HCC.** Flow cytometry analysis (A), Transwell assays (scale bar: 10  $\mu$ m) (B), EdU incorporation assays (scale bar: 10  $\mu$ m) (C) and anticancer drug sensitivity tests (D) were carried out in miR-5188-overexpressing HCC cells, miR-5188-overexpressing HCC cells with  $\beta$ -catenin knockdown, miR-5188-overexpressing HCC cells with miR-5188 knockdown, and the corresponding control cells (n=3 independent experiments, one-way ANOVA). All data are presented as the mean  $\pm$  SD. Experiments were repeated three times.

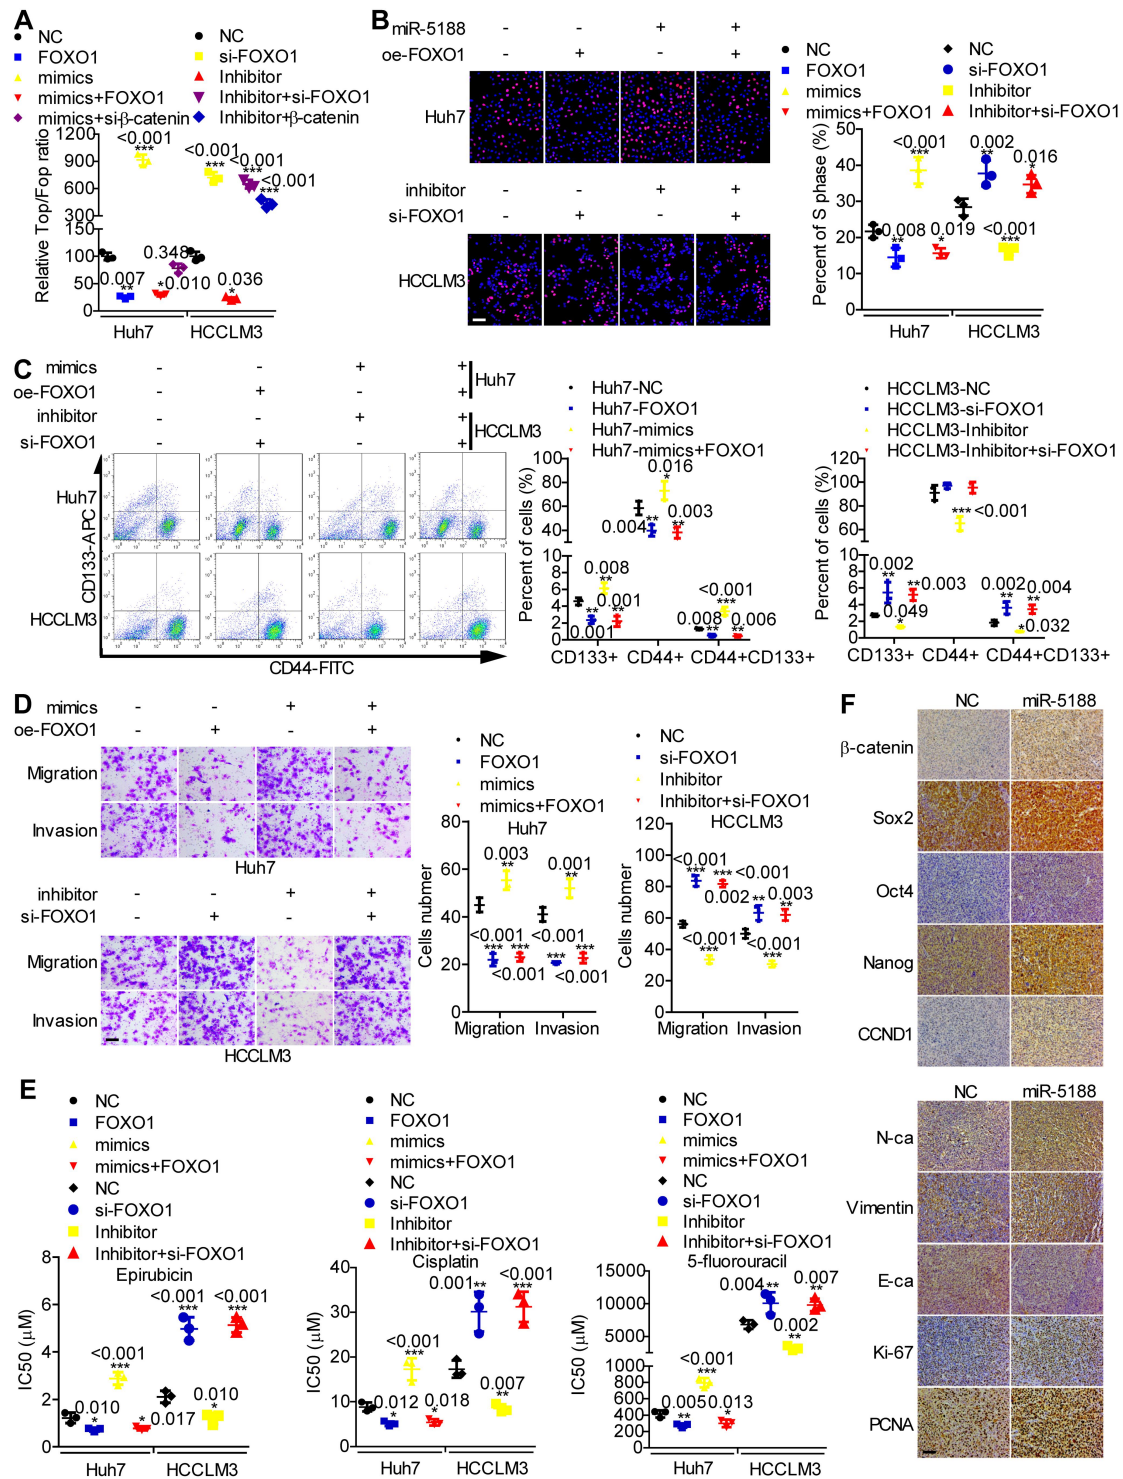

35

36 **Figure S4. MiR-5188 regulates FOXO1-mediated tumor stemness, metastasis,**  
 37 **proliferation, chemoresistance and Wnt/ $\beta$ -catenin signaling in HCC. TOP/FOP**  
 38 **luciferase reporter assay showing Wnt/ $\beta$ -catenin signaling activity (A), EdU**  
 39 **incorporation assays (scale bar: 10  $\mu$ m) (B), flow cytometry analysis (C), Transwell**  
 40 **assays (scale bar: 10  $\mu$ m) (D) and anticancer drug sensitivity tests (E) were performed**  
 41 **in FOXO1-overexpressing Huh7 cells, miR-5188-overexpressing Huh7 cells,**  
 42 **miR-5188-overexpressing Huh7 cells with FOXO1 overexpression, FOXO1-silenced**  
 43 **HCCLM3 cells, miR-5188-silenced HCCLM3 cells, miR-5188-silenced HCCLM3**

44 cells with FOXO1 knockdown, and the corresponding control cells (n=3 independent  
45 experiments, one-way ANOVA) (comparison of all groups vs. the NC group). **(F)**  
46 Immunohistochemical analysis was used to examine  $\beta$ -catenin, Sox2, Oct4, Nanog,  
47 CCND1, E-ca, N-ca, vimentin, Ki67 and PCNA protein expression levels in xenograft  
48 tumors derived from Huh7 cells stably overexpressing miR-5188 and control cells  
49 (scale bar: 10  $\mu$ m) (n=5). All data are presented as the mean  $\pm$  SD. Experiments were  
50 repeated three times.

51

52

53

54

55

56

57

58

59

60

61

62

63

64

65

66

67

68

69

70

71

72

73

74

75

76

77

78

79

80

81

82

83

84

85

86

87

88 **Supplementary Tables**

| <b>Table S1. The sequences used in this study.</b> |           |                                                                                                                                |                                 |
|----------------------------------------------------|-----------|--------------------------------------------------------------------------------------------------------------------------------|---------------------------------|
| c-Jun                                              | 1         | Sense                                                                                                                          | 5' GGCACAGCUUAAACAGAAA dTdT 3'  |
|                                                    |           | Antisense                                                                                                                      | 3' dTdT CCGUGUCGAAUUUGUCUUU 5'  |
|                                                    | 2         | Sense                                                                                                                          | 5' CGCAGCAGUUGCAAACAUAU dTdT 3' |
|                                                    |           | Antisense                                                                                                                      | 3' dTdT GCGUCGUCAACGUUUGUAA 5'  |
| FOXO1                                              | 1         | Sense                                                                                                                          | 5' CUGCAUCCAUGGACAACAA dTdT 3'  |
|                                                    |           | Antisense                                                                                                                      | 3' dTdT TGACGUAGGUACCUGUUGUU 5' |
|                                                    | 2         | Sense                                                                                                                          | 5' CCAGAUGCCUAUACAAACA dTdT 3'  |
|                                                    |           | Antisense                                                                                                                      | 3' dTdT GGUCUACGGUAUUGUUUGU 5'  |
| HBX                                                | 1         | Sense                                                                                                                          | 5' GCACUUCGCUUCACCUCUG dTdT 3'  |
|                                                    |           | Antisense                                                                                                                      | 3' dTdT CGUGAAGCAAGUGGAGAC 5'   |
|                                                    | 2         | Sense                                                                                                                          | 5' -GGUCUUACAUAAGAGGACU dTdT 3' |
|                                                    |           | Antisense                                                                                                                      | 3' dTdT CCAGAAUGUAUUCUCCUGA 5'  |
| β-catenin                                          | 1         | Sense                                                                                                                          | 5' GAUGGUGUCUGCUAUUGUA dTdT 3'  |
|                                                    |           | Antisense                                                                                                                      | 3' dTdT CUACCACAGACGAUAACA 5'   |
|                                                    | 2         | Sense                                                                                                                          | 5' GGACAAGGAAGCUGCAGAA dTdT 3'  |
|                                                    |           | Antisense                                                                                                                      | 3' dTdT CCUGUCCUUCGACGUCUU 5'   |
| miR-5188 mimics                                    | Sense     | 5' AAUCGGACCCAUUUAACCGGAG 3'                                                                                                   |                                 |
|                                                    | Antisense | 3' UUAGCCUGGGUAAAUUUGGCCUC 5'                                                                                                  |                                 |
| Negative control                                   | Sense     | 5' UUUGUACUACACAAAAGUACUG 3'                                                                                                   |                                 |
|                                                    | Antisense | 3' AAACAUGAUGUGUUUCAUGAC 5'                                                                                                    |                                 |
| miR-5188 inhibitor                                 |           | 5' CUCCGGUUUAAAUGGGUCCGAU 3'                                                                                                   |                                 |
| Inhibitor negative control                         |           | 5' CAGUACUUUUGUGUAGUACAAA 3'                                                                                                   |                                 |
| miR-5188 precursor                                 |           | 5' GGGAGGCAUGGAAAUUUCUCUGGUUCAA<br>UGGGUACGAUUAUUGUAAGCAGGAUCCA<br>CAAUAAUCGGACCCAUUUAACCGGAGAU<br>UAAAAAGACAGGAAUAGAAUCCCA 3' |                                 |

89

90

91

92

93

94

95

96

97

98

99

100

**Table S2. The primers used in this study.**

| Primers name           |         | Sequence (5'-3')        |
|------------------------|---------|-------------------------|
| c-Jun                  | Forward | TCAGACAGTGCCCGAGATG     |
|                        | Reverse | CTGCTGCGTTAGCATGAGTT    |
| FOXO1                  | Forward | TGAACCGCCTGACCCAA       |
|                        | Reverse | CAATGAACATGCCATCCAAG    |
| HBX                    | Forward | CACTTCGCTTCACCTCTGC     |
|                        | Reverse | TCGGTCGTTGACATTGCTG     |
| $\beta$ -catenin       | Forward | GGCCCAGAATGCAGTTCGCCTT  |
|                        | Reverse | AATGGCACCCCTGCTCACGCA   |
| $\beta$ actin          | Forward | CTCGCTGTCCACCTTCCA      |
|                        | Reverse | ACCTTCACCGTTCCAGTTTT    |
| miR-5188               |         | AATCGGACCCATTTAAACCGGAG |
| U6                     | Forward | CTCGCTTCGGCAGCACA       |
|                        | Reverse | AACGCTTCACGAATTTGCGT    |
| Pre-miR-5188           | Forward | TCTGGTTTCAATGGGTACG     |
|                        | Reverse | TCTCCGGTTTAAATGGGTC     |
| promoter of miR-5188-A | Forward | TGCGACGGAGAAAAGCC       |
|                        | Reverse | GGGACCCTGACGTGAAGTT     |
| promoter of miR-5188-B | Forward | GAGTCACCCAAGTCCCGTCCTA  |
|                        | Reverse | AGCGAGCGTCCTGATCCTTC    |
| promoter of miR-5188-C | Forward | TGCGAGATGGACGGGTCTT     |
|                        | Reverse | AGGCTCAGGGAGGTTGAAGG    |

101  
102  
103  
104  
105  
106  
107  
108  
109  
110  
111  
112  
113  
114  
115  
116  
117  
118  
119  
120

**Table S3. A list of antibodies used for WB, ChIP, EMSA, Co-IP, ICC and IHC.**

| Antibodies name         | Cat. No    | Company     | Species | Dulution                                                         |
|-------------------------|------------|-------------|---------|------------------------------------------------------------------|
| Flag                    | F7425      | Sigma       | Rabbit  | 1:1000 (WB); 1:20 (Co-IP)                                        |
| HBX                     | sc-57760   | Santa Cruz  | Mouse   | 1:1000 (WB); 1:20 (Co-IP); 1:100 (ICC)                           |
| Ki67                    | ab16667    | Abcam       | Rabbit  | 1:100 (IHC)                                                      |
| c-Jun                   | 9165       | CST         | Rabbit  | 1:1000 (WB); 1:50 (ChIP); 1:15 (EMSA); 1:20 (Co-IP); 1:300 (IHC) |
| $\beta$ -catenin        | 8480       | CST         | Rabbit  | 1:1000 (WB); 1:100 (ICC); 1:100 (IHC)                            |
| $\beta$ -catenin        | 2677       | CST         | Mouse   | 1:200 (ICC)                                                      |
| Active $\beta$ -catenin | 19807      | CST         | Rabbit  | 1:1000 (WB)                                                      |
| CD44                    | 3570       | CST         | Mouse   | 1:1000 (WB)                                                      |
| ABCG2                   | 42078      | CST         | Rabbit  | 1:1000 (WB)                                                      |
| FOXO1                   | 2880       | CST         | Rabbit  | 1:1000 (WB); 1:20 (Co-IP); 1:100 (ICC); 1:100 (IHC)              |
| Slug                    | 9585       | CST         | Rabbit  | 1:1000 (WB)                                                      |
| PCNA                    | 13110      | CST         | Rabbit  | 1:1000 (IHC)                                                     |
| c-Myc                   | 10828-1-AP | Proteintech | Rabbit  | 1:1000 (WB)                                                      |
| CCND1                   | 60186-1-Ig | Proteintech | Mouse   | 1:1000 (WB)                                                      |
| CCND1                   | ab134175   | Abcam       | Rabbit  | 1:100 (IHC)                                                      |
| SOX2                    | 20118-1-AP | Proteintech | Rabbit  | 1:1000 (WB); 1:100 (IHC)                                         |
| OCT4                    | 11263-1-AP | Proteintech | Rabbit  | 1:1000 (WB); 1:100 (IHC)                                         |
| Nanog                   | 14295-1-AP | Proteintech | Rabbit  | 1:1000 (WB); 1:100 (IHC)                                         |
| ABCB1                   | 22336-1-AP | Proteintech | Rabbit  | 1:1000 (WB)                                                      |
| E-cadherin              | 60335-1-Ig | Proteintech | Mouse   | 1:1000 (WB); 1:100 (IHC)                                         |
| N-cadherin              | 66219-1-Ig | Proteintech | Mouse   | 1:1000 (WB); 1:100 (IHC)                                         |
| Vimentin                | 10366-1-AP | Proteintech | Rabbit  | 1:1000 (WB); 1:1000 (IHC)                                        |
| CD133                   | 18470-1-AP | Proteintech | Rabbit  | 1:1000 (WB)                                                      |
| GAPDH                   | 60004-1-Ig | Proteintech | Mouse   | 1:5000 (WB)                                                      |
| Histone                 | 17168-1-AP | Proteintech | Rabbit  | 1:1000 (WB)                                                      |
| $\beta$ -actin          | 60008-1-Ig | Proteintech | Mouse   | 1:5000 (WB)                                                      |

- 121 ChIP: chromatin immunoprecipitation  
122 EMSA: electrophoretic mobility shift assay  
123 ICC: immunofluorescence  
124 IHC: immunohistochemistry  
125 Co-IP: co-immunoprecipitation  
126 WB: western blot  
127



**Table S4. The sequences used in Electrophoretic mobility shift assay (5'-3').**

|           |             |                  |                                                      |
|-----------|-------------|------------------|------------------------------------------------------|
| miR-5188  | probes      | wild             | ACGGGTGACGTCACGACAGCCCTAGAGTCACCCAAATTTTGGGTCACATT   |
|           |             | type             | ACGGGTGACGTCACGACAGCCCTAGAGTCACCCAAATTTTGGGTCACATT   |
|           | competitors | site 1 mutant    | ACGGGCTGTTCTTCGACAGCCCTAGAGTCACCCAAATTTTGGGTCACATT   |
|           |             | site 2 mutant    | ACGGGTGACGTCACGACAGCCCTCATTCTTCCCAAATTTTGGGTCACATT   |
|           |             | site 3 mutant    | ACGGGTGACGTCACGACAGCCCTAGAGTCACCCAAATTTTCAATGTTTCATT |
|           |             | all sites mutant | ACGGGCTGTTCTTCGACAGCCCTCATTCTTCCCAAATTTTCAATGTTTCATT |
| MYH9      | probes      | wild             | AGGGCAGCGTCTGTGACTGACTCATTATGAGCTCACATAATCATCATGACAT |
|           |             | type             | CATCATAGCAAATACCTAGATGGACAGTGTGTGAATCAGGCACGGGAAC    |
|           | competitors | site 1 mutant    | AGGGCAGCGTCTGTGACTGACTCATTATGAGCTCACATAATCATCATGACAT |
|           |             | site 2 mutant    | AGGGCAGCGTCTGTGACTGACTCATTATGAGCTCACATAATCATCCACACG  |
|           |             | site 3 mutant    | TCGTCCAGCAAATACCTAGATGGACAGTGTGTGAATCAGGCACGGGAAC    |
|           |             | all sites mutant | AGGGCAGCGTAGAGAGTCCTCTAGGTATGAGCTCACATAATCATCCACACG  |
|           |             | site 1 mutant    | CATCATAGCAAATACCTAGATGGACAAGAGGACACCGAGAGCACGGGAAC   |
|           |             | site 2 mutant    | TCGTCCAGCAAATACCTAGATGGACAAGAGGACACCGAGAGCACGGGAAC   |
|           |             | site 3 mutant    | TCGTCCAGCAAATACCTAGATGGACAAGAGGACACCGAGAGCACGGGAAC   |
|           |             | all sites mutant | TCGTCCAGCAAATACCTAGATGGACAAGAGGACACCGAGAGCACGGGAAC   |
| Ubiquitin | probes      | wild             | GGGACTTGGGTGACTCTAGGGCACTGGTATGTCACAAAGCTGGTGACTCAGC |
|           |             | type             | CTTTAAACACTGAAAACGGATCCAGTGACTCATCCCGATTCTTGCACA     |
|           | competitors | site 1 mutant    | GGGACTTGGGGCGGAGAAGGGCACTGGTATGTCACAAAGCTGGTGACTCAG  |
|           |             | site 2 mutant    | CCTTTAAACACTGAAAACGGATCCAGTGACTCATCCCGATTCTTGCACA    |
|           |             | site 3 mutant    | GGGACTTGGGTGACTCTAGGGCACTGGTATGTCACAAGAACAATGGAAGA   |
|           |             | all sites mutant | CCTTTAAACACTGAAAACGGGGAAGAACGTTAGATTTAGTTCTTGCACA    |
|           |             | site 1 mutant    | CCTTTAAACACTGAAAACGGGGAAGAACGTTAGATTTAGTTCTTGCACA    |
|           |             | site 2 mutant    | CCTTTAAACACTGAAAACGGGGAAGAACGTTAGATTTAGTTCTTGCACA    |
|           |             | site 3 mutant    | CCTTTAAACACTGAAAACGGGGAAGAACGTTAGATTTAGTTCTTGCACA    |
|           |             | all sites mutant | CCTTTAAACACTGAAAACGGGGAAGAACGTTAGATTTAGTTCTTGCACA    |

**Table S5. Correlations between miR-5188 expression and the clinicopathological features of hepatocellular carcinoma patients**

| Characteristics          | n   | miR-5188 expression |             | P value |
|--------------------------|-----|---------------------|-------------|---------|
|                          |     | Low                 | High        |         |
| Age (years)              |     |                     |             |         |
| ≤Median                  | 91  | 42 (46.2%)          | 49 (53.8%)  | 0.185   |
| >Median                  | 93  | 52 (56.4%)          | 41 (43.6%)  |         |
| Gender                   |     |                     |             |         |
| Male                     | 159 | 77 (48.4%)          | 82 (51.6%)  | 0.049   |
| Female                   | 26  | 18 (69.2%)          | 8 (30.8%)   |         |
| AJCC stage               |     |                     |             |         |
| I - II                   | 133 | 77 (57.9%)          | 56 (42.1%)  | 0.026   |
| III-IV                   | 44  | 17 (38.6%)          | 27 (61.4%)  |         |
| T classification         |     |                     |             |         |
| T1-T2                    | 142 | 79 (55.6%)          | 63 (44.4%)  | 0.034   |
| T3-T4                    | 43  | 16 (37.2%)          | 27 (62.8%)  |         |
| N classification         |     |                     |             |         |
| N0                       | 176 | 93 (52.8%)          | 83 (100.0%) | 1.000   |
| N1                       | 1   | 1 (47.2%)           | 0 (0.0%)    |         |
| Distant metastasis       |     |                     |             |         |
| No                       | 177 | 95 (53.7%)          | 82 (46.3%)  | 0.466   |
| Yes                      | 1   | 0 (0.0%)            | 1 (100.0%)  |         |
| Vascular invasion        |     |                     |             |         |
| No                       | 144 | 69 (47.9%)          | 75 (52.1%)  | 0.080   |
| Yes                      | 41  | 26 (63.4%)          | 15 (36.6%)  |         |
| Hepatic cirrhosis        |     |                     |             |         |
| No                       | 66  | 30 (45.5%)          | 36 (54.5%)  | 0.232   |
| Yes                      | 119 | 65 (54.6%)          | 54 (45.4%)  |         |
| HBsAg                    |     |                     |             |         |
| Negative                 | 13  | 11 (84.6%)          | 2 (15.4%)   | 0.047   |
| Positive                 | 81  | 45 (55.6%)          | 36 (44.4%)  |         |
| Recurrence               |     |                     |             |         |
| No                       | 37  | 28 (75.7%)          | 9 (24.3%)   | 0.028   |
| Yes                      | 53  | 28 (52.8%)          | 25 (47.2%)  |         |
| AFP (ng/ml)              |     |                     |             |         |
| ≤20                      | 27  | 17 (63.0%)          | 10 (37.0%)  | 0.924   |
| >20                      | 63  | 39 (61.9%)          | 24 (38.1%)  |         |
| Total bilirubin (umol/L) |     |                     |             |         |
| ≤20                      | 74  | 44 (59.5%)          | 30 (40.5%)  | 0.245   |

|                         |          |    |            |            |       |
|-------------------------|----------|----|------------|------------|-------|
|                         | >20      | 16 | 12 (75.0%) | 4 (25.0%)  |       |
| ALT (U/L)               |          |    |            |            |       |
|                         | ≤45      | 50 | 32 (64.0%) | 18 (36.0%) | 0.697 |
|                         | >45      | 40 | 24 (60.0%) | 16 (40.0%) |       |
| GGT (U/L)               |          |    |            |            |       |
|                         | ≤40      | 25 | 17 (68.0%) | 8 (32.0%)  | 0.483 |
|                         | >40      | 65 | 39 (60.0%) | 26 (40.0%) |       |
| Edmondson-Steiner grade |          |    |            |            |       |
|                         | I - II   | 61 | 20 (32.8%) | 41 (67.2%) | 0.414 |
|                         | III-IV   | 34 | 14 (41.2%) | 20 (58.8%) |       |
| Tumor number            |          |    |            |            |       |
|                         | Single   | 25 | 9 (34.0%)  | 16 (64.0%) | 0.539 |
|                         | Multiple | 45 | 13 (29.5%) | 32 (70.5%) |       |
| Tumor size (cm)         |          |    |            |            |       |
|                         | ≤5       | 42 | 13 (31.0%) | 29 (69.0%) | 0.344 |
|                         | >5       | 52 | 21 (40.4%) | 31 (59.6%) |       |

---

130  
131  
132  
133  
134  
135  
136  
137  
138  
139  
140  
141  
142  
143  
144  
145  
146  
147  
148  
149  
150  
151  
152  
153  
154  
155

**Table S6. Univariate and multivariate survival analysis of clinicopathological variables of hepatocellular carcinoma patients**

| Characteristics          | Overall survival    |               |         |                       |               |         |
|--------------------------|---------------------|---------------|---------|-----------------------|---------------|---------|
|                          | univariate analysis |               |         | Multivariate analysis |               |         |
|                          | HR                  | 95% CI        | P value | HR                    | 95% CI        | P value |
| miR-5188 expression      | 0.59                | (0.403-0.864) | 0.007   | 0.684                 | (0.482-0.970) | 0.033   |
| Low vs. High             |                     |               |         |                       |               |         |
| Age (years)              | 0.927               | (0.239-1.615) | 0.865   |                       |               |         |
| ≤Median vs. > Median     |                     |               |         |                       |               |         |
| Gender                   | 1.575               | (0.956-2.595) | 0.074   |                       |               |         |
| Male vs. Female          |                     |               |         |                       |               |         |
| AJCC stage               | 0.256               | (0.150-0.436) | < 0.001 | 0.509                 | (0.322-0.805) | 0.004   |
| I - II vs. III-IV        |                     |               |         |                       |               |         |
| T classification         | 0.286               | (0.170-0.481) | < 0.001 | 0.598                 | (0.385-0.930) | 0.022   |
| T1-T2 vs. T3-T4          |                     |               |         |                       |               |         |
| N classification         | 0.045               | (0.001-2.418) | 0.127   |                       |               |         |
| N0 vs. N1                |                     |               |         |                       |               |         |
| Distant metastasis       | 0.000               | (0.000-0.000) | < 0.001 |                       |               |         |
| No vs. Yes               |                     |               |         |                       |               |         |
| Recurrence               | 0.217               | (0.123-0.385) | < 0.001 | 0.131                 | (0.058-0.296) | < 0.001 |
| No vs. Yes               |                     |               |         |                       |               |         |
| HBsAg                    | 1.222               | (0.543-2.754) | 0.628   |                       |               |         |
| Negative vs. Positive    |                     |               |         |                       |               |         |
| Vascular invasion        | 0.508               | (0.313-0.822) | 0.006   | 0.564                 | (0.385-0.827) | 0.003   |
| No vs. Yes               |                     |               |         |                       |               |         |
| Hepatic cirrhosis        | 1.269               | (0.849-1.897) | 0.245   |                       |               |         |
| No vs. Yes               |                     |               |         |                       |               |         |
| AFP (ng/ml)              | 0.872               | (0.474-1.602) | 0.658   |                       |               |         |
| ≤20 vs. >20              |                     |               |         |                       |               |         |
| Total bilirubin (umol/L) | 1.453               | (0.690-3.059) | 0.325   |                       |               |         |
| ≤20 vs. >20              |                     |               |         |                       |               |         |
| ALT (U/L)                | 0.638               | (0.357-1.138) | 0.128   |                       |               |         |
| ≤45 vs. >45              |                     |               |         |                       |               |         |
| GGT (U/L)                | 0.643               | (0.350-1.180) | 0.154   |                       |               |         |
| ≤40 vs. >40              |                     |               |         |                       |               |         |

|                               |       |               |       |       |                     |
|-------------------------------|-------|---------------|-------|-------|---------------------|
| Edmondson-Steiner<br>grade    | 0.725 | (0.421-1.249) | 0.247 |       |                     |
| I - II vs. III-IV             |       |               |       |       |                     |
| Tumor number                  | 1.73  | (0.896-3.339) | 0.102 |       |                     |
| Single vs.<br><i>Multiple</i> |       |               |       |       |                     |
| Tumor size (cm)               | 0.475 | (0.283-0.799) | 0.005 | 0.966 | (0.531-1.760) 0.911 |
| $\leq 5$ vs. $> 5$            |       |               |       |       |                     |

---
